# Supplementary material for: Different Ability of Multidrug-Resistant and -Sensitive Counterpart Cells to Release and Capture Extracellular Vesicles
Source: MDPI journal article supplement (doi:10.3390/cells10112886), 2021-10-26
Supplement: s1 [file s1]

## Supplementary Materials:

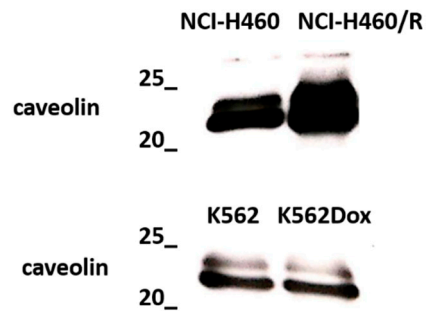

**Supplementary Figure S1:** Comparison of the levels of caveolin between drug sensitive (NCI-H460 or K562) and MDR (NCI-H460/R or K562Dox) counterpart cells, analysed by Western blot.

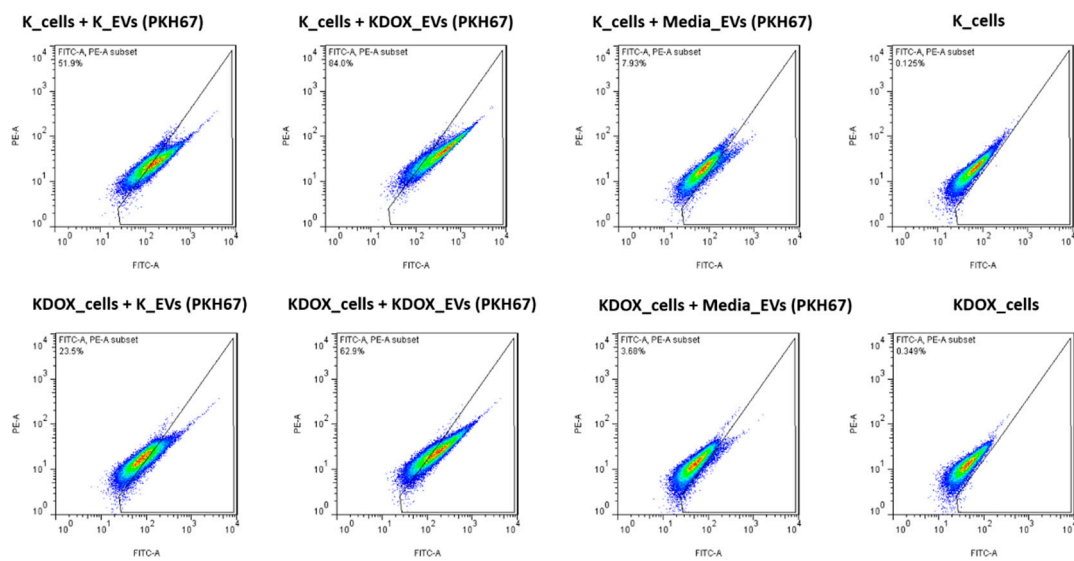

**Supplementary Figure S2:** Image representative of the FACS analysis.

### EEA-1 analysis

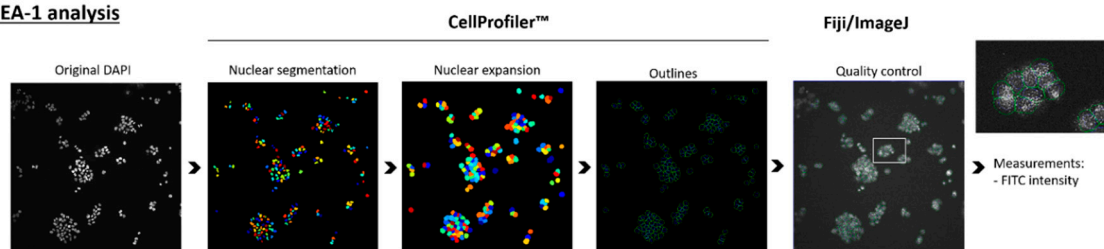

### LAMP-1 analysis

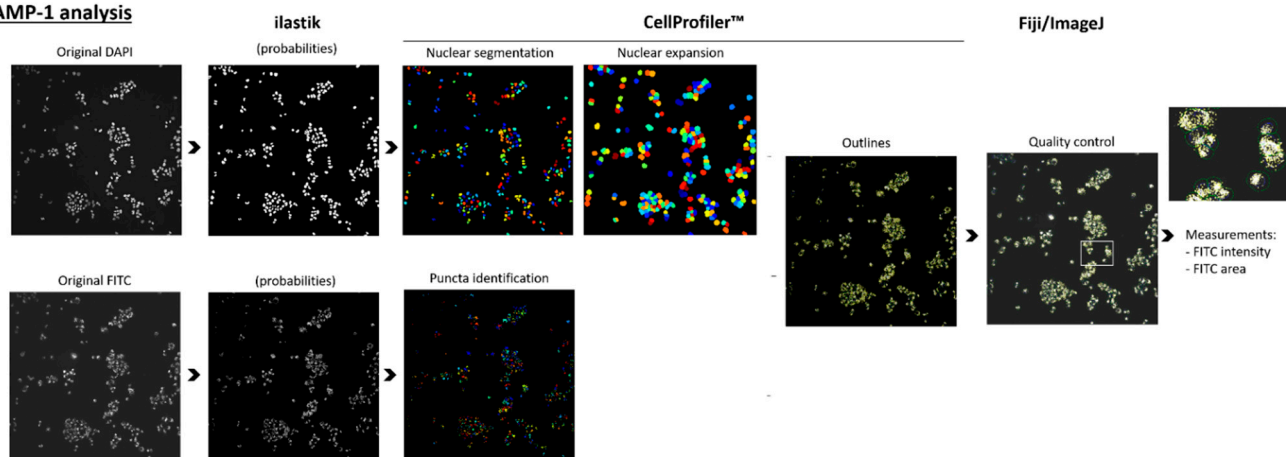

### Transferrin Receptor analysis

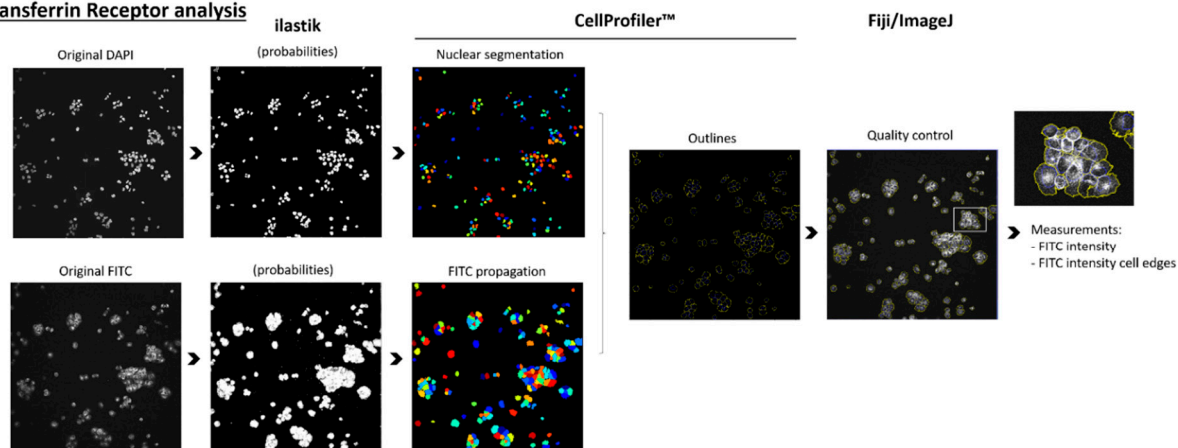

Supplementary Figure S3: Layout of the image analysis using ilastik and Cell Profiler™ software which allowed image cell segmentation and signal quantification.
